# Supplementary material
Source: publisher figshare collection journal article supplement (https://sage.figshare.com/ndownloader/files/20109098)
Supplement: Supplementary file 1 [file 20109098]

Appendix A  
*Individual Interview and Focus Group Questions*

Individual Interview Questions:

- What can you tell me about your experiences in school here? What's it like to go to school here? What is most important for me to know?
- What do you like the best about your school?
- What do you like the least about your school?
- What things really help you to be successful?
- What makes it really hard to be successful?

- Do you feel like you belong in your school, or that you don't belong at school?
- Do you feel you are an important part of your school, or not important at your school?
- Do you feel safe at your school, or do you feel unsafe? How, and in what ways?
- Do students at your school help each other, even if they are not friends, or do they only help each other if they are friends?

- How do you think teachers feel about students?
- What do you think teachers think your (student) role is in the school?
- Do you feel like you can talk to teachers about things that are bothering you at school?
- Do teachers care about students? How do they show this? How do they not show this?
- Do teachers value who you are? How do you know this?
- Do teachers value your ethnic heritage? How do you know this?
- What do good teachers do?

- Is being [your ethnicity-race] important in this school? Can you explain?
- What do you think other kids think about [your ethnicity-race] students?
- Do you think ethnicity or race are things that kids think about in your school? Why? Can you give me some examples?
- Are you able to make friends from kids from different ethnic or racial groups here? Why?
- Do you think your ethnicity-race are important in the kinds of experiences you have at school?
- Does ethnicity-race matter? Why or why don't you think so?

Focus Group Questions:

- One of the things I have heard in this project is that students are treated the same/fairly. Tell me more about that.
- One of the things I have heard in this project is that the school is very diverse. Is there anything good about this? Is there anything that can be hard/challenging about this?
- What does being [your race, ethnicity, or nationality] mean to you, if anything?
- One of the things I have heard is that teachers don't care about your ethnicity-race. Should they care?
- Do you think you should learn about your ethnic-racial history in school?
- Is it important to you to have kids that are of your same ethnicity-race in your classes? Why or why not?
